# Supplementary material
Source: MDPI journal article supplement (https://www.mdpi.com/1996-1073/16/16/6097)
Supplement: s1 [file s1]

## Supplementary material

# Economic and ecological impacts on the integration of biomass-based SNG and FT diesel in the Austrian energy system

Martin Hammerschmid<sup>1</sup>, Alexander Bartik, Florian Benedikt, Marton Veress, Simon Pratschner, Stefan Müller and Hermann Hofbauer

TU WIEN, Institute of Chemical, Environmental and Bioscience Engineering, Getreidemarkt 9/166, 1060 Vienna, Austria

## Assumptions and references for process simulation to calculate mass and energy balances for biomass-based SNG and FT route

Table S1. Assumptions for the units of the gasification, gas cooling & cleaning section

| Parameter                                                  | Unit                                      | Value/Assumption | Reference    |
|------------------------------------------------------------|-------------------------------------------|------------------|--------------|
| <b>Biomass dryer</b>                                       |                                           |                  | [65, 66]     |
| Water content incoming biomass                             | wt.-%                                     | 40               |              |
| Water content exiting biomass                              | wt.-%                                     | 20               |              |
| Temperature drying air inlet                               | °C                                        | 90               |              |
| Relative humidity drying air inlet                         | %                                         | 80               |              |
| Relative humidity drying air outlet                        | %                                         | 80               |              |
| <b>DFB gasification reactor</b>                            |                                           |                  | [66-68]      |
| Operating temperature                                      | °C                                        | 820              |              |
| Steam to fuel ratio                                        | kg <sub>H2O</sub> /kg <sub>fuel,daf</sub> | 0.6              |              |
| Heat loss (related to thermal fuel power)                  | %                                         | 1                |              |
| Temperature steam                                          | °C                                        | 400              |              |
| <b>DFB combustion reactor</b>                              |                                           |                  | [66-68]      |
| Lambda                                                     | kg/kg                                     | 1.25             |              |
| CO slip                                                    | mol CO/mol CO <sub>2</sub>                | 0.05             |              |
| Heat loss (related to thermal fuel power)                  | %                                         | 1                |              |
| <b>PG filter</b>                                           |                                           |                  | [69]         |
| Separation efficiency dust                                 | %                                         | 99.9             |              |
| Separation efficiency char                                 | %                                         | 99.9             |              |
| Separation efficiency tar                                  | %                                         | 30               |              |
| <b>RME scrubber</b>                                        |                                           |                  | [19, 70, 71] |
| Circulating solvent to gas ratio                           | kg <sub>RME</sub> /kg <sub>gas</sub>      | 20               |              |
| Tar concentration outlet                                   | g/Nm <sup>3</sup>                         | 1.5              |              |
| Temperature exiting gas                                    | °C                                        | 40               |              |
| Temperature incoming RME                                   | °C                                        | 37               |              |
| Separation efficiency ammonia (inclusive downstream units) | %                                         | 99.9             |              |
| Massflow fresh RME make-up                                 | kg/h                                      | 110              | [19]         |
| <b>AC adsorber</b>                                         |                                           |                  | [38, 45]     |
| Separation efficiency tar                                  | %                                         | 100              |              |
| Separation efficiency sulfur                               | %                                         | 100              |              |
| Adsorption capacity AC                                     | wt.-%                                     | 20               |              |
| Steam regeneration temperature                             | °C                                        | 250              | [38]         |
| Steam amount for regeneration                              | kg/kg <sub>BTX</sub>                      | 9.2              | [38]         |

<sup>1</sup> Corresponding author. Tel.: +43 1 58801 166856; E-mail address: martin.hammerschmid@tuwien.ac.at

**Auxiliary and pressure drop**

|                                                                            |       |     |         |
|----------------------------------------------------------------------------|-------|-----|---------|
| Steam pre-evaporation (related to amount of water phase from RME scrubber) | wt.-% | 5   | assumed |
| Total pressure drop product gas route                                      | mbar  | 345 | assumed |
| Total pressure drop flue gas route                                         | mbar  | 345 | assumed |

**Blowers**

|                                              |   |    |          |
|----------------------------------------------|---|----|----------|
| Efficiency of drive system (all units)       | % | 95 | [66, 72] |
| Mechanical efficiency of blowers (all units) | % | 98 |          |
| Isentropic efficiencies                      |   |    |          |
| Drying air blower                            | % | 80 |          |
| PG blower                                    | % | 50 |          |
| PG recycle blower                            | % | 50 |          |
| FG blower                                    | % | 75 |          |
| FG recycle blower                            | % | 75 |          |
| Combustion air blower 1                      | % | 65 |          |
| Combustion air blower 2                      | % | 45 |          |

Table S2. Assumptions for the units of the SNG synthesis and upgrading section

| Parameter                                | Unit                                 | Value/Assumption                  | Reference |
|------------------------------------------|--------------------------------------|-----------------------------------|-----------|
| <b>Compressor</b>                        |                                      |                                   | [73]      |
| Efficiency of drive system               | %                                    | 95                                |           |
| Mechanical efficiency of compressor      | %                                    | 98                                |           |
| Isentropic efficiency                    | %                                    | 85                                |           |
| <b>Guard reactor (ZnO)</b>               |                                      |                                   |           |
| GHSV                                     | h <sup>-1</sup>                      | 3800                              | [74]      |
| <b>Fluidized bed methanation reactor</b> |                                      |                                   |           |
| Reaction temperature                     | °C                                   | 320                               | [75]      |
| Reaction pressure                        | bar                                  | 10                                | assumed   |
| WHSV                                     | Nm <sup>3</sup> /kg <sub>cat</sub> h | 1.5                               | [75]      |
| Steam content inlet                      | vol.-%                               | 15                                | assumed   |
| Pressure drop                            | mbar                                 | 150                               | assumed   |
| Catalyst type                            | -                                    | Ni/Al <sub>2</sub> O <sub>3</sub> | [75]      |
| <b>CO<sub>2</sub> scrubber</b>           |                                      |                                   |           |
| Gas inlet temperature                    | °C                                   | 40                                | [76]      |
| Gas outlet temperature                   | °C                                   | 60                                | assumed   |
| Separation efficiency CO <sub>2</sub>    | %                                    | 97.5                              | assumed   |
| Reboiler duty                            | MJ/kgCO <sub>2</sub>                 | 0.8                               | [38]      |
| Absorption capacity                      | kg CO <sub>2</sub> /kg amine         | 0.36                              | [77]      |
| Amine make-up stream                     | kg/t <sub>CO2</sub>                  | 1.5                               | [76]      |
| <b>Glycol dryer</b>                      |                                      |                                   |           |
| Gas inlet temperature                    | °C                                   | 30                                | [78]      |
| Gas outlet temperature                   | °C                                   | 31                                | [78]      |
| Glycol regeneration temperature          | °C                                   | 190                               | [78]      |
| Glycol make-up stream                    | kg/h                                 | 0.1                               | [79]      |

Table S3. Assumptions for the units of the FT synthesis and upgrading section

| Parameter                                    | Unit                                 | Value/Assumption                       | Reference            |
|----------------------------------------------|--------------------------------------|----------------------------------------|----------------------|
| <b>Compressor</b>                            |                                      |                                        | [73]                 |
| Efficiency of drive system                   | %                                    | 95                                     |                      |
| Mechanical efficiency of compressor          | %                                    | 98                                     |                      |
| Isentropic efficiency                        | %                                    | 85                                     |                      |
| <b>CO<sub>2</sub> scrubber</b>               |                                      |                                        |                      |
| Gas inlet temperature                        | °C                                   | 40                                     | [76]                 |
| Gas outlet temperature                       | °C                                   | 60                                     | assumed              |
| Separation efficiency CO <sub>2</sub>        | %                                    | 80                                     | assumed <sup>2</sup> |
| Reboiler duty                                | MJ/kgCO <sub>2</sub>                 | 0.8                                    | [38]                 |
| Absorption capacity                          | kg CO <sub>2</sub> /kg amine         | 0.36                                   | [77]                 |
| Amine make-up stream                         | kg/tCO <sub>2</sub>                  | 1.5                                    | [76]                 |
| <b>Guard reactor (ZnO)</b>                   |                                      |                                        |                      |
| GHSV                                         | h <sup>-1</sup>                      | 3800                                   | [74]                 |
| <b>FT slurry reactor</b>                     |                                      |                                        |                      |
| Reaction temperature                         | °C                                   | 230                                    | [40]                 |
| Reaction pressure                            | bar                                  | 21                                     | [40]                 |
| CO-Conversion                                | mol.-%                               | 50                                     | [40]                 |
| CO <sub>2</sub> -Conversion (WGS activity)   | mol.-%                               | 0                                      | [40]                 |
| α <sub>1</sub> (eASF distribution parameter) | -                                    | 0.78                                   | [40]                 |
| α <sub>2</sub> (eASF distribution parameter) | -                                    | 0.9                                    | [40]                 |
| β (eASF distribution parameter)              | -                                    | 0.75                                   | [40]                 |
| γ (eASF distribution parameter)              | -                                    | 0.48                                   | [40]                 |
| μ (eASF distribution parameter)              | -                                    | 0.95                                   | [40]                 |
| Naphtha compounds in liquid phase            | mass.-%                              | 0                                      | assumed <sup>3</sup> |
| Middle distillate compounds in liquid phase  | mass.-%                              | 0.05                                   | assumed <sup>3</sup> |
| Naphtha compounds in liquid phase            | mass.-%                              | 0.75                                   | assumed <sup>3</sup> |
| Recirculation ratio tailgas                  | vol.-%                               | 85                                     | assumed <sup>4</sup> |
| WHSV                                         | Nm <sup>3</sup> /kg <sub>cat</sub> h | 2.0                                    | [80]                 |
| Pressure drop                                | mbar                                 | 300                                    | assumed              |
| Catalyst type                                | -                                    | Co/Al <sub>2</sub> O <sub>3</sub>      | [81]                 |
| <b>Quench column</b>                         |                                      |                                        |                      |
| Temperature (top)                            | °C                                   | 70                                     | [81]                 |
| <b>Steam Reformer</b>                        |                                      |                                        |                      |
| Reaction temperature                         | °C                                   | 850                                    | [82]                 |
| Reaction pressure                            | bar                                  | 10                                     | [82]                 |
| CH <sub>4</sub> -Conversion                  | vol.-%                               | 90                                     | [82]                 |
| C <sub>2</sub> H <sub>4</sub> -Conversion    | vol.-%                               | 90                                     | [82]                 |
| C <sub>2</sub> H <sub>6</sub> -Conversion    | vol.-%                               | 95                                     | [82]                 |
| C <sub>3</sub> H <sub>8</sub> -Conversion    | vol.-%                               | 99                                     | [82]                 |
| Steam/Carbon ratio                           | -                                    | 2.5                                    | [83]                 |
| WHSV                                         | Nm <sup>3</sup> /kg <sub>cat</sub> h | 2.5                                    | assumed              |
| Pressure drop                                | mbar                                 | 300                                    | assumed              |
| Catalyst type                                | -                                    | NiO/CaAl <sub>12</sub> O <sub>19</sub> | [84]                 |

<sup>2</sup> Separation efficiency was set to adjust balance in Steam Reformer in favor of H<sub>2</sub>/CO ratio of tailgas<sup>3</sup> Liquid and gas phase distribution of FT products assumed according to phase equilibrium at process conditions<sup>4</sup> Recirculation ratio assumed according to heat demand of steam reformer (15% of tailgas combusted = purge gas)

|                                                       |                                                                  |                                                     |              |
|-------------------------------------------------------|------------------------------------------------------------------|-----------------------------------------------------|--------------|
| <b>Hydrocracker</b>                                   |                                                                  |                                                     |              |
| Reaction temperature                                  | °C                                                               | 360                                                 | [81, 85, 86] |
| Reaction pressure                                     | bar                                                              | 40                                                  | [81, 85, 86] |
| Wax conversion                                        | %                                                                | 70                                                  | [86, 87]     |
| Outlet concentration C <sub>1</sub> -C <sub>3</sub>   | wt.-%<br>(without wax)                                           | 5                                                   | [81]         |
| Outlet concentration C <sub>4</sub> -C <sub>9</sub>   | wt.-%<br>(without wax)                                           | 20                                                  | [81]         |
| Outlet concentration C <sub>10</sub> -C <sub>20</sub> | wt.-%<br>(without wax)                                           | 75                                                  | [81]         |
| LHSV                                                  | Nm <sup>3</sup> <sub>wax</sub> /Nm <sup>3</sup> <sub>cat</sub> h | 1                                                   | [81, 85, 86] |
| Hydrogen make-up stream                               | wt.-% <sub>H2</sub> /wt.-% <sub>wax</sub>                        | 1                                                   | [81]         |
| Catalyst type                                         | -                                                                | Pt/SiO <sub>2</sub> -Al <sub>2</sub> O <sub>3</sub> | [87, 88]     |
| <b>Hydrotreater</b>                                   |                                                                  |                                                     |              |
| Reaction temperature                                  | °C                                                               | 350                                                 | [86, 89]     |
| Reaction pressure                                     | bar                                                              | 40                                                  | [86, 89]     |
| LHSV                                                  | Nm <sup>3</sup> <sub>MD</sub> /Nm <sup>3</sup> <sub>cat</sub> h  | 2                                                   | [86, 89]     |
| Hydrogen make-up stream                               | wt.-% <sub>H2</sub> /wt.-% <sub>MD</sub>                         | 0.3                                                 | [86]         |
| Catalyst type                                         | -                                                                | Ni-MoS <sub>2</sub> /Al <sub>2</sub> O <sub>3</sub> | [85, 90]     |

Table S4. Assumptions as well as results for biomass and gas compositions

| Parameter                      | Unit                 | Value/Assumption | Reference |
|--------------------------------|----------------------|------------------|-----------|
| <b>Biomass composition</b>     |                      |                  | [5]       |
| Water content                  | wt.-%                | 40               |           |
| Ash content                    | wt.-% <sub>db</sub>  | 1                |           |
| Carbon                         | wt.-% <sub>db</sub>  | 50.7             |           |
| Hydrogen                       | wt.-% <sub>db</sub>  | 5.9              |           |
| Nitrogen                       | wt.-% <sub>db</sub>  | 0.21             |           |
| Sulfur                         | wt.-% <sub>db</sub>  | 0.01             |           |
| <b>Product gas composition</b> |                      |                  | [91]      |
| Hydrogen                       | vol.-% <sub>db</sub> | 45               |           |
| Carbon dioxide                 | vol.-% <sub>db</sub> | 21.15            |           |
| Carbon monoxide                | vol.-% <sub>db</sub> | 23               |           |
| Methane                        | vol.-% <sub>db</sub> | 9.7              |           |
| Ethylene                       | vol.-% <sub>db</sub> | 1                |           |
| Ethane                         | vol.-% <sub>db</sub> | 0.1              |           |
| Water content                  | vol.-%               | 30               |           |
| Ammonia                        | ppm <sub>v,db</sub>  | 950              |           |
| Nitrogen                       | ppm <sub>v,db</sub>  | 350              |           |
| Dust                           | g/Nm <sup>3</sup>    | 10               |           |
| Char                           | g/Nm <sup>3</sup>    | 10               |           |
| Tar                            | g/Nm <sup>3</sup>    | 5                |           |
| <b>SNG composition</b>         |                      |                  | result    |
| Methane                        | vol.-%               | 94.62            |           |
| Hydrogen                       | vol.-%               | 2.82             |           |
| Carbon dioxide                 | vol.-%               | 2.34             |           |
| Nitrogen                       | vol.-%               | 0.12             |           |
| Carbon monoxide                | vol.-%               | 0.093            |           |

|                                                                       |                     |       |               |
|-----------------------------------------------------------------------|---------------------|-------|---------------|
| Relative density                                                      | -                   | 0.564 |               |
| Wobbe index                                                           | MJ/Nm <sup>3</sup>  | 50.55 |               |
| Higher heating value                                                  | MJ/Nm <sup>3</sup>  | 37.95 |               |
| <b>FT product composition (excluding C<sub>1</sub>-C<sub>3</sub>)</b> |                     |       | <b>result</b> |
| FT naphtha (C <sub>4</sub> -C <sub>9</sub> )                          | wt.-% <sub>db</sub> | 23.67 |               |
| FT middle distillate (C <sub>10</sub> -C <sub>19</sub> )              | wt.-% <sub>db</sub> | 37.25 |               |
| FT wax (C <sub>20</sub> +)                                            | wt.-% <sub>db</sub> | 39.08 |               |

## Assumptions and references for techno-economic assessment to calculate production costs for biomass-based SNG and FT route

Table S5. Assumptions for cost rates

| Parameter                                       | Unit                             | Value/Assumption       | Reference |
|-------------------------------------------------|----------------------------------|------------------------|-----------|
| <b>General plant parameters</b>                 |                                  |                        | [11, 92]  |
| Plant lifetime                                  | a                                | 20                     |           |
| Number of employees                             | -                                | 7                      |           |
| Personnel costs per employee 2022               | €/a                              | 65000                  |           |
| Personnel costs per employee 2019               | €/a                              | 62500                  |           |
| Operating hours plant                           | h/a                              | 7500                   |           |
| Operating hours district heat                   | h/a                              | 5800                   |           |
| Maintenance costs                               | % <sub>CAPEX</sub> /a            | 2.0                    |           |
| Insurance, administration and other costs       | % <sub>CAPEX</sub> /a            | 1.5                    |           |
| Interest rate                                   | %                                | 6                      |           |
| <b>Consumption-related parameters</b>           |                                  |                        |           |
| Natural gas household price 2022                | €/MWh                            | 150                    | [93, 94]  |
| Natural gas household price 2019                | €/MWh                            | 69.7                   | [93]      |
| Natural gas industry price 2022                 | €/MWh                            | 88.9                   | [93]      |
| Natural gas industry price 2019                 | €/MWh                            | 29.9                   | [93]      |
| Fossil diesel price petrol station 2022         | €/l                              | 1.939<br>(incl. taxes) | [95]      |
| Fossil diesel price petrol station 2019         | €/l                              | 1.236<br>(incl. taxes) | [95]      |
| Fossil diesel price stock market 2022           | €/l                              | 1.595<br>(incl. taxes) | [96]      |
| Fossil diesel price stock market 2019           | €/l                              | 0.934<br>(incl. taxes) | [96]      |
| Wood chips price 2022                           | €/t <sub>atro</sub>              | 95                     | [11]      |
| Wood chips price 2019                           | €/t <sub>atro</sub>              | 75                     | [11]      |
| Fresh scrubber solvent (RME) <sup>5</sup>       | €/kg <sub>2013</sub>             | 0.96                   | [66]      |
| Fresh amine (MEA) <sup>5</sup>                  | €/kg <sub>2013</sub>             | 1.40                   | [98]      |
| Fresh glycol (TEG) <sup>5</sup>                 | €/kg <sub>2016</sub>             | 2.0                    | [99]      |
| Activated carbon <sup>5</sup> (lifetime 1 year) | €/kg <sub>2019</sub>             | 2.21                   | [11]      |
| Zinc oxide <sup>5</sup> (lifetime 3 years)      | €/kg <sub>2013</sub>             | 20                     | [100]     |
| Olivine <sup>5</sup>                            | €/t <sub>2013</sub>              | 190                    | [66]      |
| Limestone <sup>5</sup>                          | €/t <sub>2013</sub>              | 35                     | [92]      |
| Nickel catalyst <sup>5</sup> (lifetime 3 years) | €/kg <sub>2011</sub>             | 50                     | [29]      |
| Cobalt catalyst <sup>5</sup> (lifetime 5 years) | €/kg <sub>2013</sub>             | 24                     | [29]      |
| Platin catalyst <sup>5</sup> (lifetime 3 years) | €/kg <sub>2014</sub>             | 1504                   | [29]      |
| Disposal costs ash <sup>5</sup>                 | €/t <sub>2013</sub>              | 90                     | [66]      |
| Disposal costs waste water <sup>5</sup>         | €/m <sup>3</sup> <sub>2019</sub> | 2.5                    | [11]      |

<sup>5</sup> Cost rates from literature inflation-adjusted with EPI [97] from literature base to reference years 2019 and 2022

|                                          |                          |       |       |
|------------------------------------------|--------------------------|-------|-------|
| CO <sub>2</sub> emission allowances 2022 | €/t <sub>CO2</sub>       | 69.6  | [101] |
| CO <sub>2</sub> emission allowances 2019 | €/t <sub>CO2</sub>       | 24.9  | [101] |
| Electricity costs (industry) 2022        | €/kWh <sub>el</sub>      | 0.21  | [102] |
| Electricity costs (industry) 2019        | €/kWh <sub>el</sub>      | 0.095 | [102] |
| Hydrogen costs 2022                      | €/kg                     | 4.5   | [103] |
| Hydrogen costs 2019                      | €/kg                     | 4.0   | [103] |
| Revenues FT naphtha <sup>5</sup>         | €/l <sub>2017</sub>      | 0.78  | [104] |
| Revenues district heat <sup>5</sup>      | €/MWh <sub>th,2016</sub> | 30.0  | [92]  |

---

Table S6. Assumptions for determination of total capital investment costs for the biomass-based SNG route

| Equipment                                                                                                                                                                                                                                                                | Base scale                | Base cost                    | Scale factor | Desired scale             | Equipment costs 2022 <sup>6</sup> | Equipment costs 2019 <sup>6</sup> | Ref.  |
|--------------------------------------------------------------------------------------------------------------------------------------------------------------------------------------------------------------------------------------------------------------------------|---------------------------|------------------------------|--------------|---------------------------|-----------------------------------|-----------------------------------|-------|
| <b>Resource supply + Gasification + Raw gas cleaning + Flue gas cleaning</b>                                                                                                                                                                                             |                           |                              |              |                           | <b>114 431 228 €</b>              | <b>83 522 433 €</b>               |       |
| (biomass dryer, gasification reactor, combustion reactor, PG cyclone, PG cooler, PG filter, RME scrubber incl regeneration, PG blower, steam generation, pre-evaporator, FG cyclone, post combustion chamber, steam superheater, FG cooler, FG filter, FG blower, stack) |                           |                              |              |                           |                                   |                                   |       |
| DFB gasification system + gas cooling and cleaning (total capital investment costs)                                                                                                                                                                                      | 15 MW <sub>th</sub>       | 21 697 500 € <sub>2020</sub> | 0.7          | 100 MW <sub>th</sub>      | 114 431 228 €                     | 83 522 433 €                      | [11]  |
| <b>Fine gas cleaning + Syngas compression and cooling</b>                                                                                                                                                                                                                |                           |                              |              |                           | <b>6 206 640 €</b>                | <b>4 505 289 €</b>                |       |
| Activated carbon adsorber (TSA)                                                                                                                                                                                                                                          | 32 MW <sub>th</sub>       | 945 180 € <sub>2018</sub>    | 0.7          | 100 MW <sub>th</sub>      | 3 043 368 €                       | 2 221 330 €                       | [28]  |
| Product gas compressor 1                                                                                                                                                                                                                                                 | 224 kW <sub>el</sub>      | 120 498 € <sub>1994</sub>    | 0.84         | 1303 kW <sub>el</sub>     | 1 256 400 €                       | 917 036 €                         | [105] |
| Intermediate cooler                                                                                                                                                                                                                                                      | 448 MW <sub>th</sub>      | 4 258 200 € <sub>2007</sub>  | 0.7          | 1.66 MW <sub>th</sub>     | 140 785 €                         | 102 758 €                         | [106] |
| Product gas compressor 2                                                                                                                                                                                                                                                 | 224 kW <sub>el</sub>      | 120 498 € <sub>1994</sub>    | 0.84         | 1442 kW <sub>el</sub>     | 1 368 204 €                       | 998 641 €                         | [105] |
| Syngas preheater                                                                                                                                                                                                                                                         | 93 m <sup>2</sup>         | 19 660 € <sub>1994</sub>     | 0.59         | 65 m <sup>2</sup>         | 36 015 €                          | 26 287 €                          | [105] |
| ZnO guard reactor                                                                                                                                                                                                                                                        | 175 MW <sub>SNG,HHV</sub> | 450 000 € <sub>2012</sub>    | 0.7          | 72 MW <sub>SNG,HHV</sub>  | 361 778 €                         | 239 237 €                         | [107] |
| <b>Methanation</b>                                                                                                                                                                                                                                                       |                           |                              |              |                           | <b>3 713 954 €</b>                | <b>2 710 785 €</b>                |       |
| Fluidized bed methanation                                                                                                                                                                                                                                                | 25 560 Nm <sup>3</sup> /h | 2 235 200 € <sub>2010</sub>  | 0.6          | 27 044 Nm <sup>3</sup> /h | 3 670 316 €                       | 2 678 934 €                       | [108] |
| Steam generator methanation                                                                                                                                                                                                                                              | 93 m <sup>2</sup>         | 19 660 € <sub>1994</sub>     | 0.59         | 90 m <sup>2</sup>         | 43 638 €                          | 31 851 €                          | [105] |
| <b>SNG Upgrading</b>                                                                                                                                                                                                                                                     |                           |                              |              |                           | <b>5 099 018 €</b>                | <b>3 721 731 €</b>                |       |
| Raw-SNG cooler                                                                                                                                                                                                                                                           | 93 m <sup>2</sup>         | 19 660 € <sub>1994</sub>     | 0.59         | 600 m <sup>2</sup>        | 133 651 €                         | 97 551 €                          | [105] |
| Raw-SNG condenser                                                                                                                                                                                                                                                        | 448 MW <sub>th</sub>      | 4 258 200 € <sub>2007</sub>  | 0.7          | 4.29 MW <sub>th</sub>     | 274 085 €                         | 200 052 €                         | [106] |
| CO <sub>2</sub> scrubber (MEA) incl. regeneration                                                                                                                                                                                                                        | 54 000 Nm <sup>3</sup> /h | 6 700 000 € <sub>2012</sub>  | 0.6          | 13 185 Nm <sup>3</sup> /h | 4 298 880 €                       | 3 137 718 €                       | [109] |
| CO <sub>2</sub> recycle blower                                                                                                                                                                                                                                           | 16 992 Nm <sup>3</sup> /h | 60 702 € <sub>1994</sub>     | 0.6          | 6 246 Nm <sup>3</sup> /h  | 75 353 €                          | 54 999 €                          | [105] |
| CO <sub>2</sub> recycle motor                                                                                                                                                                                                                                            | 7.5 kW <sub>el</sub>      | 11 144 € <sub>1994</sub>     | 0.56         | 8.9 kW <sub>el</sub>      | 29 189 €                          | 21 304 €                          | [105] |
| SNG cooler                                                                                                                                                                                                                                                               | 93 m <sup>2</sup>         | 19 660 € <sub>1994</sub>     | 0.59         | 65 m <sup>2</sup>         | 36 015 €                          | 26 287 €                          | [105] |
| Glycol dryer incl. regeneration                                                                                                                                                                                                                                          | 41664 Nm <sup>3</sup> /h  | 457 507 € <sub>2016</sub>    | 0.6          | 6938 Nm <sup>3</sup> /h   | 251 845 €                         | 183 820 €                         | [78]  |
| <b>Total equipment costs SNG route (without DFB)</b>                                                                                                                                                                                                                     |                           |                              |              |                           | <b>15 019 612 €</b>               | <b>10 937 805 €</b>               |       |
| <b>Total capital investment costs SNG route (Lang factor = 4.87 [54])</b>                                                                                                                                                                                                |                           |                              |              |                           | <b>187 576 738 €</b>              | <b>136 789 544 €</b>              |       |

<sup>6</sup> Calculated according to equation 3 from main text in chapter 2.3

Table S7. Assumptions for determination of total capital investment costs for the biomass-based FT route

| Equipment                                                                                                                                                                                                                                                                | Base scale                          | Base cost                     | Scale factor | Desired scale             | Equipment costs 2022 <sup>7</sup> | Equipment costs 2019 <sup>7</sup> | Ref.      |
|--------------------------------------------------------------------------------------------------------------------------------------------------------------------------------------------------------------------------------------------------------------------------|-------------------------------------|-------------------------------|--------------|---------------------------|-----------------------------------|-----------------------------------|-----------|
| <b>Resource supply + Gasification + Raw gas cleaning + Flue gas cleaning</b>                                                                                                                                                                                             |                                     |                               |              |                           | <b>114 431 228 €</b>              | <b>83 522 433 €</b>               |           |
| (biomass dryer, gasification reactor, combustion reactor, PG cyclone, PG cooler, PG filter, RME scrubber incl regeneration, PG blower, steam generation, pre-evaporator, FG cyclone, post combustion chamber, steam superheater, FG cooler, FG filter, FG blower, stack) |                                     |                               |              |                           |                                   |                                   |           |
| DFB gasification system + gas cooling and cleaning (total capital investment costs)                                                                                                                                                                                      | 15 MW <sub>th</sub>                 | 21 697 500 € <sub>2020</sub>  | 0.7          | 100 MW <sub>th</sub>      | 114 431 228 €                     | 83 522 433 €                      | [11]      |
| <b>Fine gas cleaning + Syngas compression and cooling</b>                                                                                                                                                                                                                |                                     |                               |              |                           | <b>14 213 796 €</b>               | <b>10 331 845 €</b>               |           |
| Activated carbon adsorber (TSA)                                                                                                                                                                                                                                          | 32 MW <sub>th</sub>                 | 945 180 € <sub>2018</sub>     | 0.7          | 100 MW <sub>th</sub>      | 3 043 368 €                       | 2 221 330 €                       | [28]      |
| Product gas compressor 1                                                                                                                                                                                                                                                 | 224 kW <sub>el</sub>                | 120 498 € <sub>1994</sub>     | 0.84         | 1303 kW <sub>el</sub>     | 1 256 400 €                       | 917 036 €                         | [105]     |
| Product gas compressor 2                                                                                                                                                                                                                                                 | 224 kW <sub>el</sub>                | 120 498 € <sub>1994</sub>     | 0.84         | 1450 kW <sub>el</sub>     | 1 374 800 €                       | 1 003 455 €                       | [105]     |
| CO <sub>2</sub> scrubber (MEA) incl. regeneration                                                                                                                                                                                                                        | 54 000 Nm <sup>3</sup> /h           | 6 700 000 € <sub>2012</sub>   | 0.6          | 23 171 Nm <sup>3</sup> /h | 6 029 535 €                       | 4 400 909 €                       | [109]     |
| CO <sub>2</sub> recycle blower                                                                                                                                                                                                                                           | 16 992 Nm <sup>3</sup> /h           | 60 702 € <sub>1994</sub>      | 0.6          | 3 890 Nm <sup>3</sup> /h  | 56 716 €                          | 41 397 €                          | [105]     |
| CO <sub>2</sub> recycle motor                                                                                                                                                                                                                                            | 7.5 kW <sub>el</sub>                | 11 144 € <sub>1994</sub>      | 0.56         | 5 kW <sub>el</sub>        | 21 100 €                          | 15 401 €                          | [105]     |
| Product gas compressor 3                                                                                                                                                                                                                                                 | 224 kW <sub>el</sub>                | 120 498 € <sub>1994</sub>     | 0.84         | 1926 kW <sub>el</sub>     | 1 744 670 €                       | 1 273 421 €                       | [105]     |
| Syngas preheater                                                                                                                                                                                                                                                         | 93 m <sup>2</sup>                   | 19 660 € <sub>1994</sub>      | 0.59         | 177 m <sup>2</sup>        | 64 991 €                          | 47 436 €                          | [105]     |
| ZnO guard reactor                                                                                                                                                                                                                                                        | 24 925 Nm <sup>3</sup> /h           | 361 778 € <sub>2022</sub>     | 0.7          | 50 442 Nm <sup>3</sup> /h | 622 216 €                         | 411 460 €                         | SNG route |
| <b>Fischer-Tropsch synthesis + Tailgas recycling</b>                                                                                                                                                                                                                     |                                     |                               |              |                           | <b>14 296 262 €</b>               | <b>10 434 726 €</b>               |           |
| Fischer-Tropsch slurry reactor                                                                                                                                                                                                                                           | 2 420 000 kW                        | 223 156 860 € <sub>2011</sub> | 0.75         | 54 124 kW                 | 4 664 232 €                       | 3 404 386 €                       | [110]     |
| Quench column incl. separation                                                                                                                                                                                                                                           | 12.1 t/h                            | 497 000 € <sub>2011</sub>     | 0.7          | 29.1 t/h                  | 1 369 811 €                       | 999 814 €                         | [29]      |
| Tail gas heater                                                                                                                                                                                                                                                          | 93 m <sup>2</sup>                   | 19 660 € <sub>1994</sub>      | 0.59         | 1011 m <sup>2</sup>       | 181 781 €                         | 132 680 €                         | [105]     |
| Steam reformer                                                                                                                                                                                                                                                           | 1 390 kmol/h                        | 9 400 000 € <sub>2007</sub>   | 0.65         | 1 617 kmol/h              | 4 182 820 €                       | 3 053 007 €                       | [29]      |
| Combustion chamber                                                                                                                                                                                                                                                       | Calculation tool (Reformer furnace) |                               |              | 14 815 kW                 | 2 848 772 €                       | 2 079 296 €                       | [46]      |
| Steam generator (reformer)                                                                                                                                                                                                                                               | 36 000 kg/h                         | 1 317 000 € <sub>2011</sub>   | 0.6          | 6 080 kg/h                | 644 012 €                         | 470 059 €                         | [29]      |
| Tail gas cooler                                                                                                                                                                                                                                                          | 93 m <sup>2</sup>                   | 19 660 € <sub>1994</sub>      | 0.59         | 1175 m <sup>2</sup>       | 198 652 €                         | 144 994 €                         | [105]     |
| Tail gas condenser                                                                                                                                                                                                                                                       | 448 MW <sub>th</sub>                | 4 258 200 € <sub>2007</sub>   | 0.7          | 2.86 MW <sub>th</sub>     | 206 182 €                         | 150 490 €                         | [106]     |

Table S7. Assumptions for determination of total capital investment costs for the biomass-based FT route (continuous)

<sup>7</sup> Calculated according to equation 3 from main text in chapter 2.3



| Equipment                                                                | Base scale        | Base cost                    | Scale factor | Desired scale     | Equipment costs 2022 <sup>8</sup> | Equipment costs 2019 <sup>8</sup> | Ref.  |
|--------------------------------------------------------------------------|-------------------|------------------------------|--------------|-------------------|-----------------------------------|-----------------------------------|-------|
| <b>Fischer-Tropsch products upgrading</b>                                |                   |                              |              |                   | <b>13 500 621 €</b>               | <b>9 853 995 €</b>                |       |
| Wax heater                                                               | 93 m <sup>2</sup> | 19 660 € <sub>1994</sub>     | 0.59         | 14 m <sup>2</sup> | 14 348 €                          | 10 473 €                          | [105] |
| Hydrocracker                                                             | 4 100 kg/h        | 6 018 429 € <sub>2007</sub>  | 0.55         | 1 728 kg/h        | 6 233 141 €                       | 4 549 519 €                       | [110] |
| Middle distillate (MD) heater                                            | 93 m <sup>2</sup> | 19 660 € <sub>1994</sub>     | 0.59         | 22 m <sup>2</sup> | 19 092 €                          | 13 935 €                          | [105] |
| Distillation                                                             | 3190 MW           | 67 179 900 € <sub>1993</sub> | 0.65         | 54.1 MW           | 2 799 167 €                       | 2 043 090 €                       | [110] |
| Hydrotreater                                                             | 1 300 kg/h        | 1 611 386 € <sub>2007</sub>  | 0.6          | 3 001 kg/h        | 4 434 873 €                       | 3 236 978 €                       | [110] |
| <b>Total equipment costs FT route (without DFB)</b>                      |                   |                              |              |                   | <b>42 010 679 €</b>               | <b>30 620 566 €</b>               |       |
| <b>Total capital investment costs FT route (Lang factor = 4.87 [54])</b> |                   |                              |              |                   | <b>319 023 235 €</b>              | <b>232 644 589 €</b>              |       |

<sup>8</sup> Calculated according to equation 3 from main text in chapter 2.3

## Assumptions and references for ecological assessment to calculate CO<sub>2</sub> footprint for biomass-based SNG and FT route

Table S8. Assumptions for CO<sub>2</sub>e emission factors

| Parameter                                                                                                                              | Unit                                          | Value  | Reference  |
|----------------------------------------------------------------------------------------------------------------------------------------|-----------------------------------------------|--------|------------|
| <b>Consumption-related emission factors</b>                                                                                            |                                               |        |            |
| Biomass (wood chips)                                                                                                                   | kg <sub>CO2e</sub> /kg <sub>wood chips</sub>  | 0.049  | [49]       |
| Bed material (olivine / limestone)                                                                                                     | kg <sub>CO2e</sub> /kg <sub>quartz sand</sub> | 0.024  | [111]      |
| Bed material transport                                                                                                                 | kg <sub>CO2e</sub> /km/t <sub>sand</sub>      | 0.057  | [112]      |
| RME scrubber solvent (rapeseed methyl ester)                                                                                           | kg <sub>CO2e</sub> /kg <sub>RME</sub>         | 1.912  | [49, 113]  |
| Activated carbon (AC)                                                                                                                  | kg <sub>CO2e</sub> /kg <sub>AC</sub>          | 14.133 | [114]      |
| Zinc oxide (only raw material)                                                                                                         | kg <sub>CO2e</sub> /kg <sub>Zinc</sub>        | 3.260  | [115]      |
| Nickel catalyst (only raw materials)<br>(20% Ni and 80% Al <sub>2</sub> O <sub>3</sub> )<br>→ for methanation and hydrotreater assumed | kg <sub>CO2e</sub> /kg <sub>catalyst</sub>    | 1.902  | [116, 117] |
| Nickel catalyst (only raw materials)<br>(14% Ni and 86% Al <sub>2</sub> O <sub>3</sub> )<br>→ for steam reformer assumed               | kg <sub>CO2e</sub> /kg <sub>catalyst</sub>    | 1.679  | [116, 117] |
| Cobalt catalyst (only raw materials)<br>(20% Co and 80% Al <sub>2</sub> O <sub>3</sub> )<br>→ for FT slurry reactor assumed            | kg <sub>CO2e</sub> /kg <sub>catalyst</sub>    | 2.472  | [117, 118] |
| Platin catalyst (only raw materials)<br>(1% Pt and 99% SiO <sub>2</sub> )<br>→ for hydrocracker assumed                                | kg <sub>CO2e</sub> /kg <sub>catalyst</sub>    | 266    | [119, 120] |
| Amine (monoethanolamine)                                                                                                               | kg <sub>CO2e</sub> /kg <sub>Amine</sub>       | 2.361  | [121]      |
| Glycol (Polyethylene glycol assumed)                                                                                                   | kg <sub>CO2e</sub> /kg <sub>PEG</sub>         | 2.240  | [122]      |
| Electricity (green electricity)                                                                                                        | kg <sub>CO2e</sub> /kWh <sub>el</sub>         | 0.014  | [49]       |
| Hydrogen (calculated via electricity consumption)                                                                                      | kWh <sub>el</sub> /kg <sub>H2</sub>           | 48     | [123]      |
| <b>Construction-related emission factors</b>                                                                                           |                                               |        |            |
| Steel for construction and equipment                                                                                                   | kg <sub>CO2e</sub> /t <sub>steel</sub>        | 1446   | [124, 125] |
| Concrete for brickwork and fundament                                                                                                   | kg <sub>CO2e</sub> /t <sub>concrete</sub>     | 107    | [126]      |
| <b>Emission factors of fossil counterparts</b>                                                                                         |                                               |        |            |
| Fossil natural gas                                                                                                                     | kg <sub>CO2e</sub> /kWh <sub>NG</sub>         | 0.268  | [49]       |
| Fossil diesel                                                                                                                          | kg <sub>CO2e</sub> /l <sub>Diesel</sub>       | 3.134  | [49]       |

## Assumptions and references for the investigation of the sectoral integration of biomass-based SNG and FT diesel in the Austrian energy system

Table S9. Assumptions for sectoral integration of DFB products

| Parameter                                                                                                              | Unit                             | Value  | Reference |
|------------------------------------------------------------------------------------------------------------------------|----------------------------------|--------|-----------|
| <b>Sectoral integration of biomass-based SNG</b>                                                                       |                                  |        |           |
| Gross value added for energy sector 2019                                                                               | M€/a                             | 9 840  | [127]     |
| Gross value added for energy sector 2022                                                                               | M€/a                             | 14 520 | [127]     |
| CO <sub>2</sub> footprint for energy sector                                                                            | Mt <sub>CO<sub>2e</sub></sub> /a | 8 269  | [2]       |
| Gross value added for public and private sector 2019 (only households with gas heaters - 25% [75])                     | M€/a                             | 16 825 | [129]     |
| Gross value added for public and private sector 2022 (only households with gas heaters - 25% [75])                     | M€/a                             | 16 135 | [129]     |
| CO <sub>2</sub> footprint for public and private sector                                                                | Mt <sub>CO<sub>2e</sub></sub> /a | 8 046  | [2]       |
| Gross value added for industry sector 2019                                                                             | M€/a                             | 66 790 | [127]     |
| Gross value added for industry sector 2022                                                                             | M€/a                             | 71 290 | [127]     |
| CO <sub>2</sub> footprint for industry sector                                                                          | Mt <sub>CO<sub>2e</sub></sub> /a | 26 540 | [2]       |
| <b>Sectoral integration of biomass-based FT diesel</b>                                                                 |                                  |        |           |
| Gross value added for public and private transport sector 2019 (only diesel vehicles – 73.6% of inland transport [75]) | M€/a                             | 49 533 | [129]     |
| Gross value added for public and private transport sector 2022 (only diesel vehicles – 73.8% of inland transport [75]) | M€/a                             | 47 822 | [129]     |
| CO <sub>2</sub> footprint for public and private transport sector                                                      | Mt <sub>CO<sub>2e</sub></sub> /a | 12 246 | [2]       |
| Gross value added for heavy-duty traffic sector 2019                                                                   | M€/a                             | 22 847 | [130]     |
| Gross value added for heavy-duty traffic sector 2022                                                                   | M€/a                             | 26 769 | [130]     |
| CO <sub>2</sub> footprint for heavy-duty traffic sector                                                                | Mt <sub>CO<sub>2e</sub></sub> /a | 9 243  | [2]       |
| Gross value added for heat and power sector 2019                                                                       | M€/a                             | 66 790 | [127]     |
| Gross value added for heat and power sector 2022                                                                       | M€/a                             | 71 290 | [127]     |
| CO <sub>2</sub> footprint for heat and power sector                                                                    | Mt <sub>CO<sub>2e</sub></sub> /a | 26 540 | [2]       |
